# Supplementary material for: Lipocalin-2 in neutrophils induces ferroptosis in septic cardiac dysfunction via increasing labile iron pool of cardiomyocytes
Source: PubMed Central journal article supplement (PMC9386130; doi:10.3389/fcvm.2022.922534), 2022-08-04
Supplement: Presentation_1.pdf [file Presentation_1.pdf]

**A**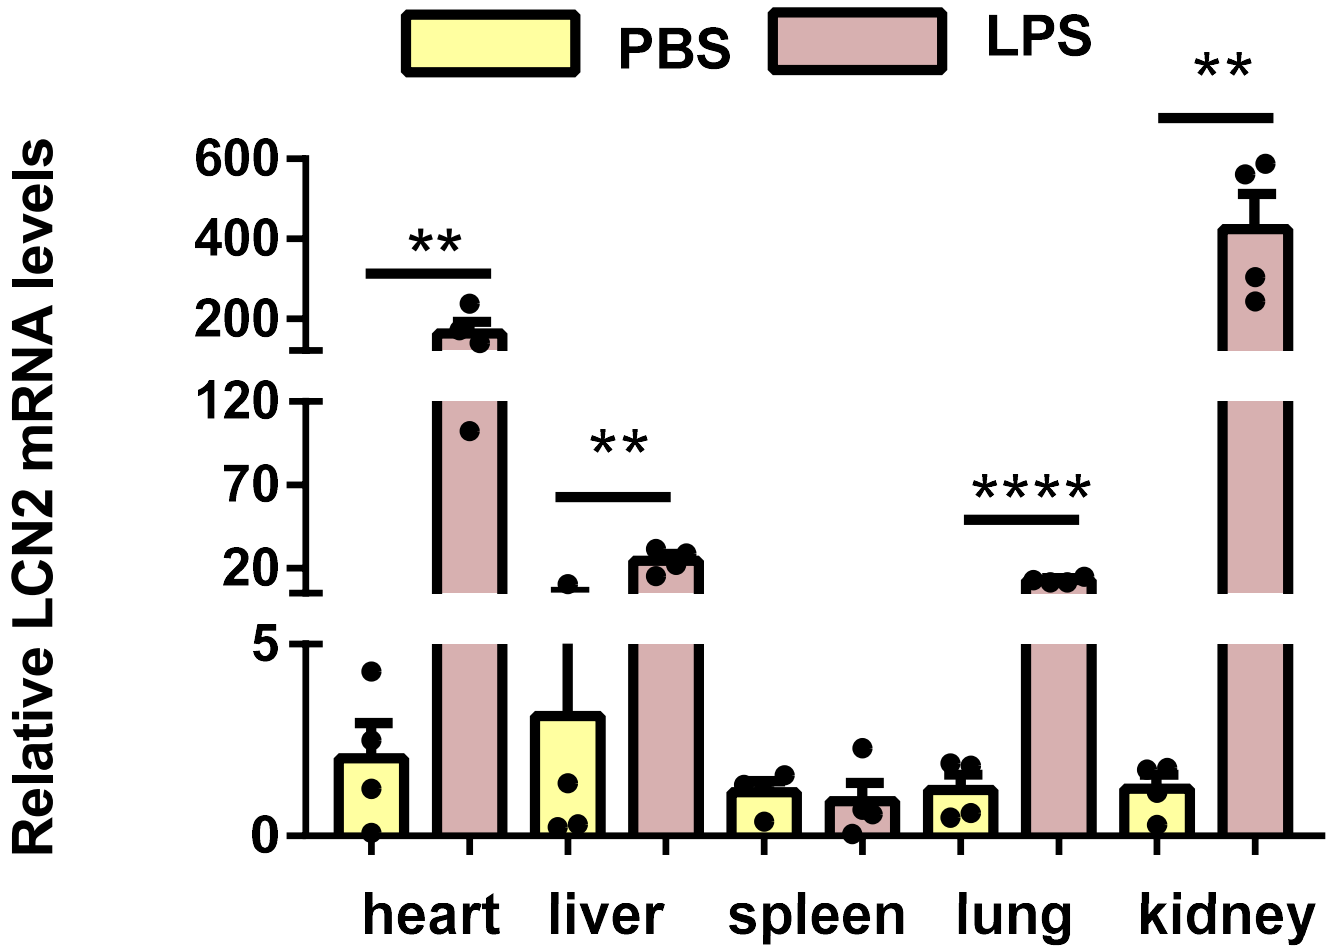

**Fig S1. LCN2 expression of tissues increased in LPS induced mice.(A)** Quantitative PCR analysis of LCN2 mRNA expressions in the tissues 12 h after intraperitoneal injection with either PBS or LPS in WT mice(n=4 in each group. Measurement data are presented as mean  $\pm$  SEM.\*\* $p$ <0.01, \*\*\*\* $p$ <0.0001.

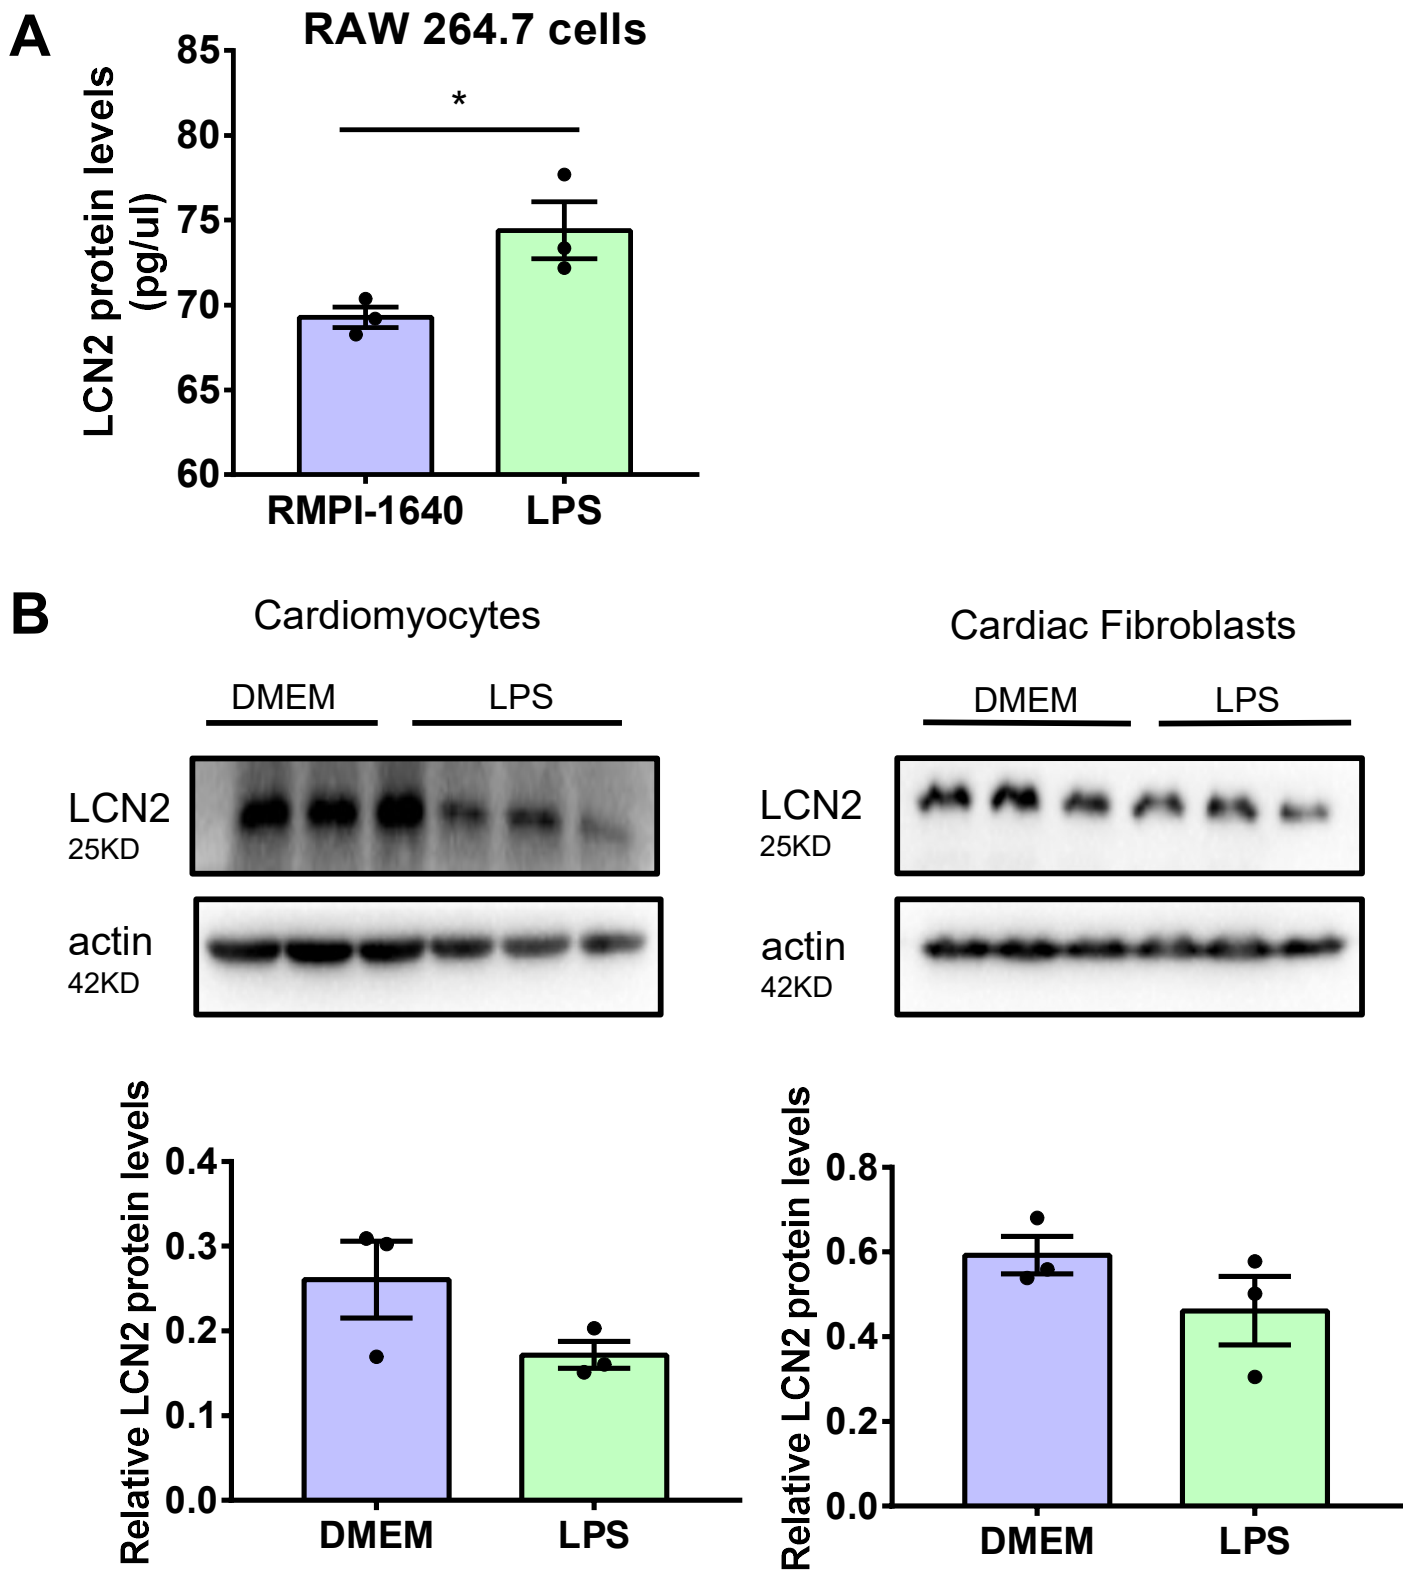

**Fig S2. LCN2 expression in RAW 264.7 cells ,cardiomyocytes and fibroblasts incubated with LPS.**(A)ELISA detection of the LCN2 in the RAW 264.7 cells after 12 h incubation with either RMPI-1640 or LPS (100ng/ml, n=3 in each group). **(B)** Western blot detection and quantitative analysis of the LCN2 protein levels in the cardiomyocytes and cardiac fibroblasts after 24 h incubation with either DMEM or LPS (1ug/ml, n=3 in each group). Measurement data are presented as mean  $\pm$ SEM, \*p<0.05.

**A**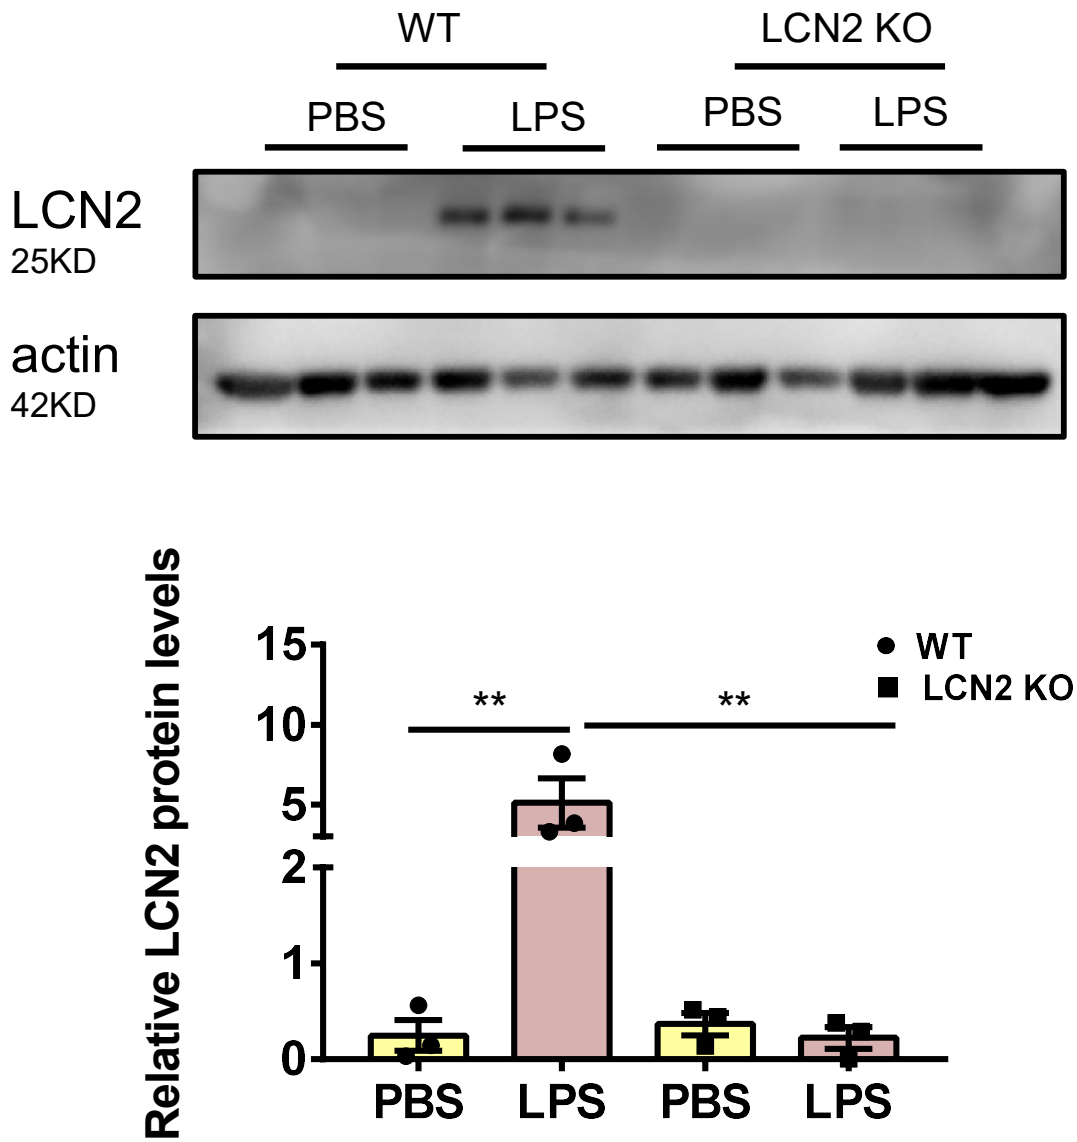

**Fig S3.LCN2 expression decreased in LCN2 KO mice.**

(A) Western blot detection and quantitative analysis of the LCN2 protein levels of LCN2 in heart tissues 12 h post intraperitoneal injection with either PBS or LPS in LCN2 KO mice and their WT littermates (n=3 in each group). Measurement data are presented as mean  $\pm$  SEM, \*\*p<0.01.

**A**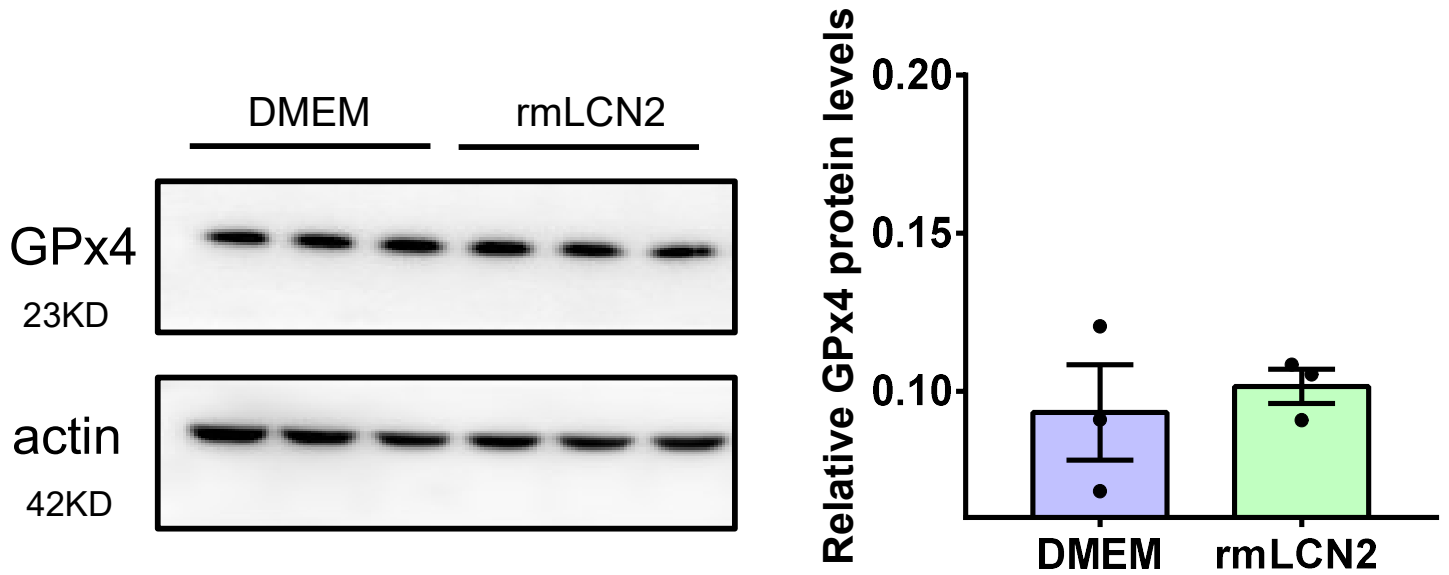

**Fig S4. Exogenous LCN2 didn't change GPx4 protein levels of H9C2.**(A) Western blot detection and quantitative analysis of the GPx4 protein levels of H9C2 incubated with either DMEM or rmLCN2 ( 1 $\mu$ g/ml ) for 24 h(n=3 in each group). Measurement data are presented as mean  $\pm$  SEM.

**A**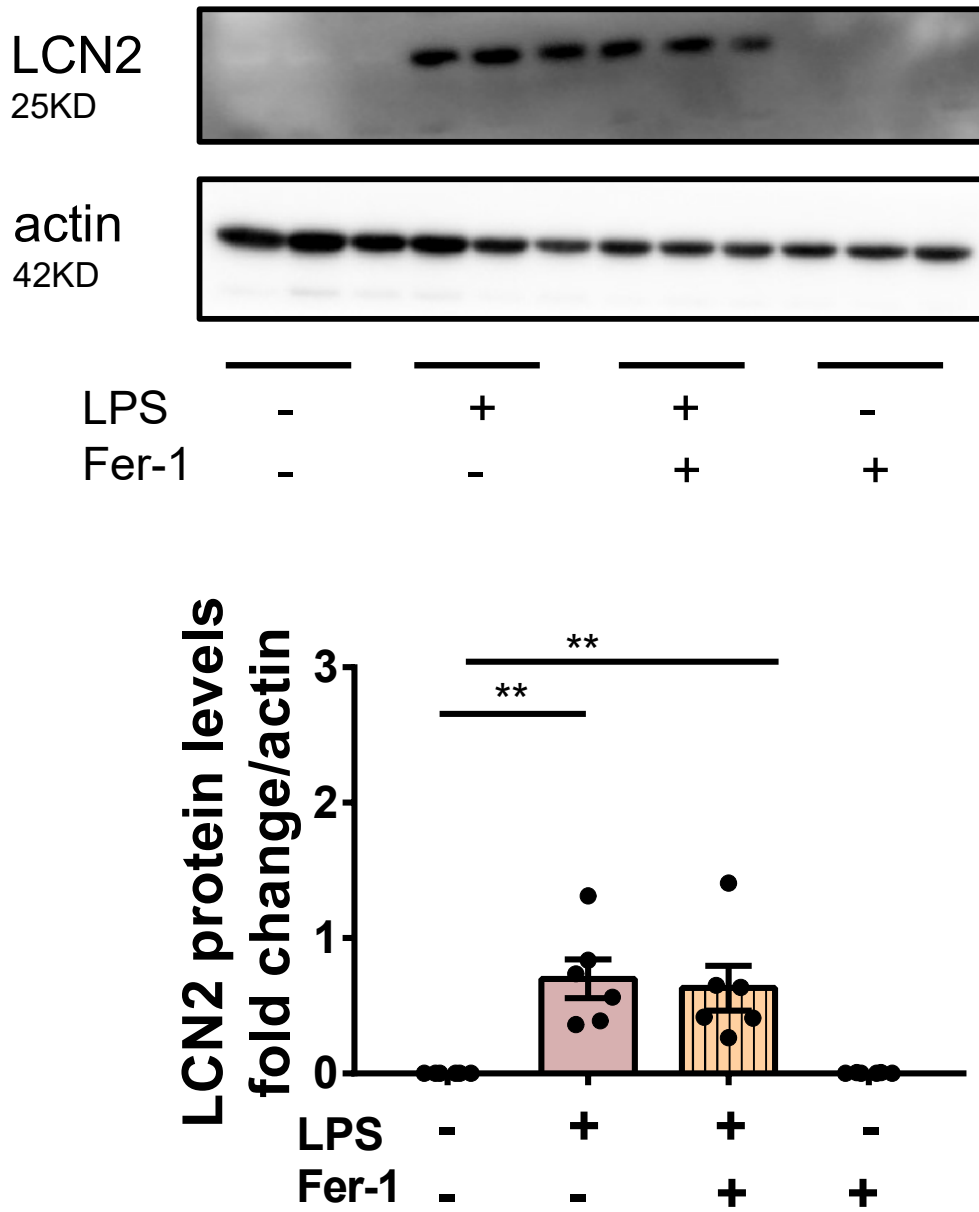

**Fig S5. Fer-1 had no effect of LCN2 expression in heart tissues of SCD mice.** (A) Western blot detection and quantitative analysis of the LCN2 protein levels in heart tissues of WT mice intraperitoneally injected either PBS or Fer-1 (1mg/kg) at 24 h, 2 h before LPS (25mg/kg) administration (n=6 in each group). Measurement data are presented as mean  $\pm$  SEM. \*\*p < 0.01.

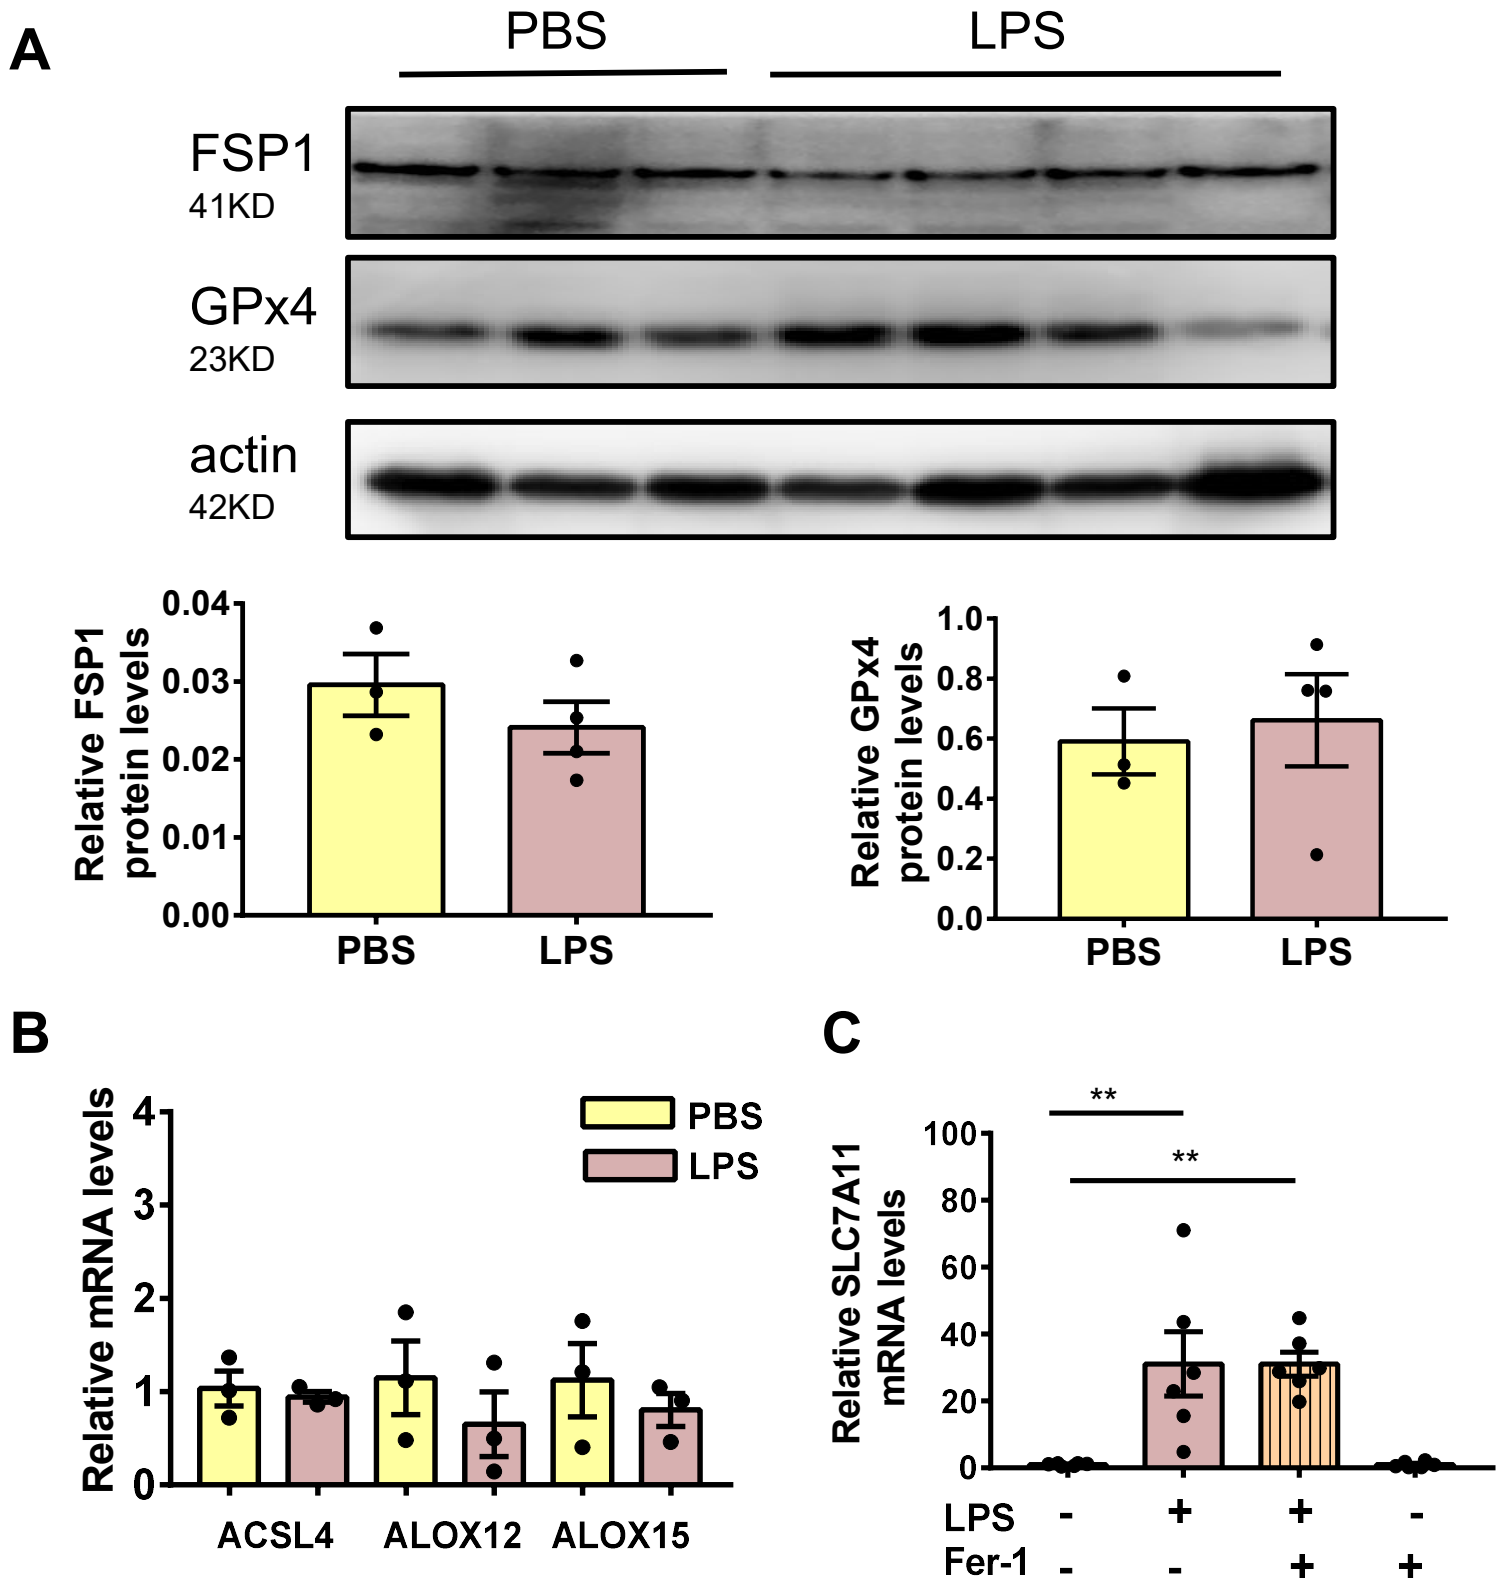

**Fig S6. Ferroptosis markers in SCD mice. (A)** Western blot detection and quantitative analysis of the FSP1 and GPx4 protein levels in the heart tissues 12h after intraperitoneal injection with either PBS(n=3) or LPS( 25mg/kg, n=4) in WT mice. **(B)** Quantitative PCR analysis of mRNA levels of ACSL4 ,ALOX12,ALOX15 in the heart tissues 12h after intraperitoneal injection with either PBS or LPS(25mg/kg) in WT mice( n=3 in each group). **(C)** Quantitative PCR analysis of mRNA levels of SLC7A11 in the heart tissues 12h of WT mice intraperitoneally injected with either PBS or Fer-1(1mg/kg) at 24 h, 2 h before LPS (25mg/kg) administration(n=6 in each group). Measurement data are presented as mean  $\pm$ SEM.\*\*p<0.01.

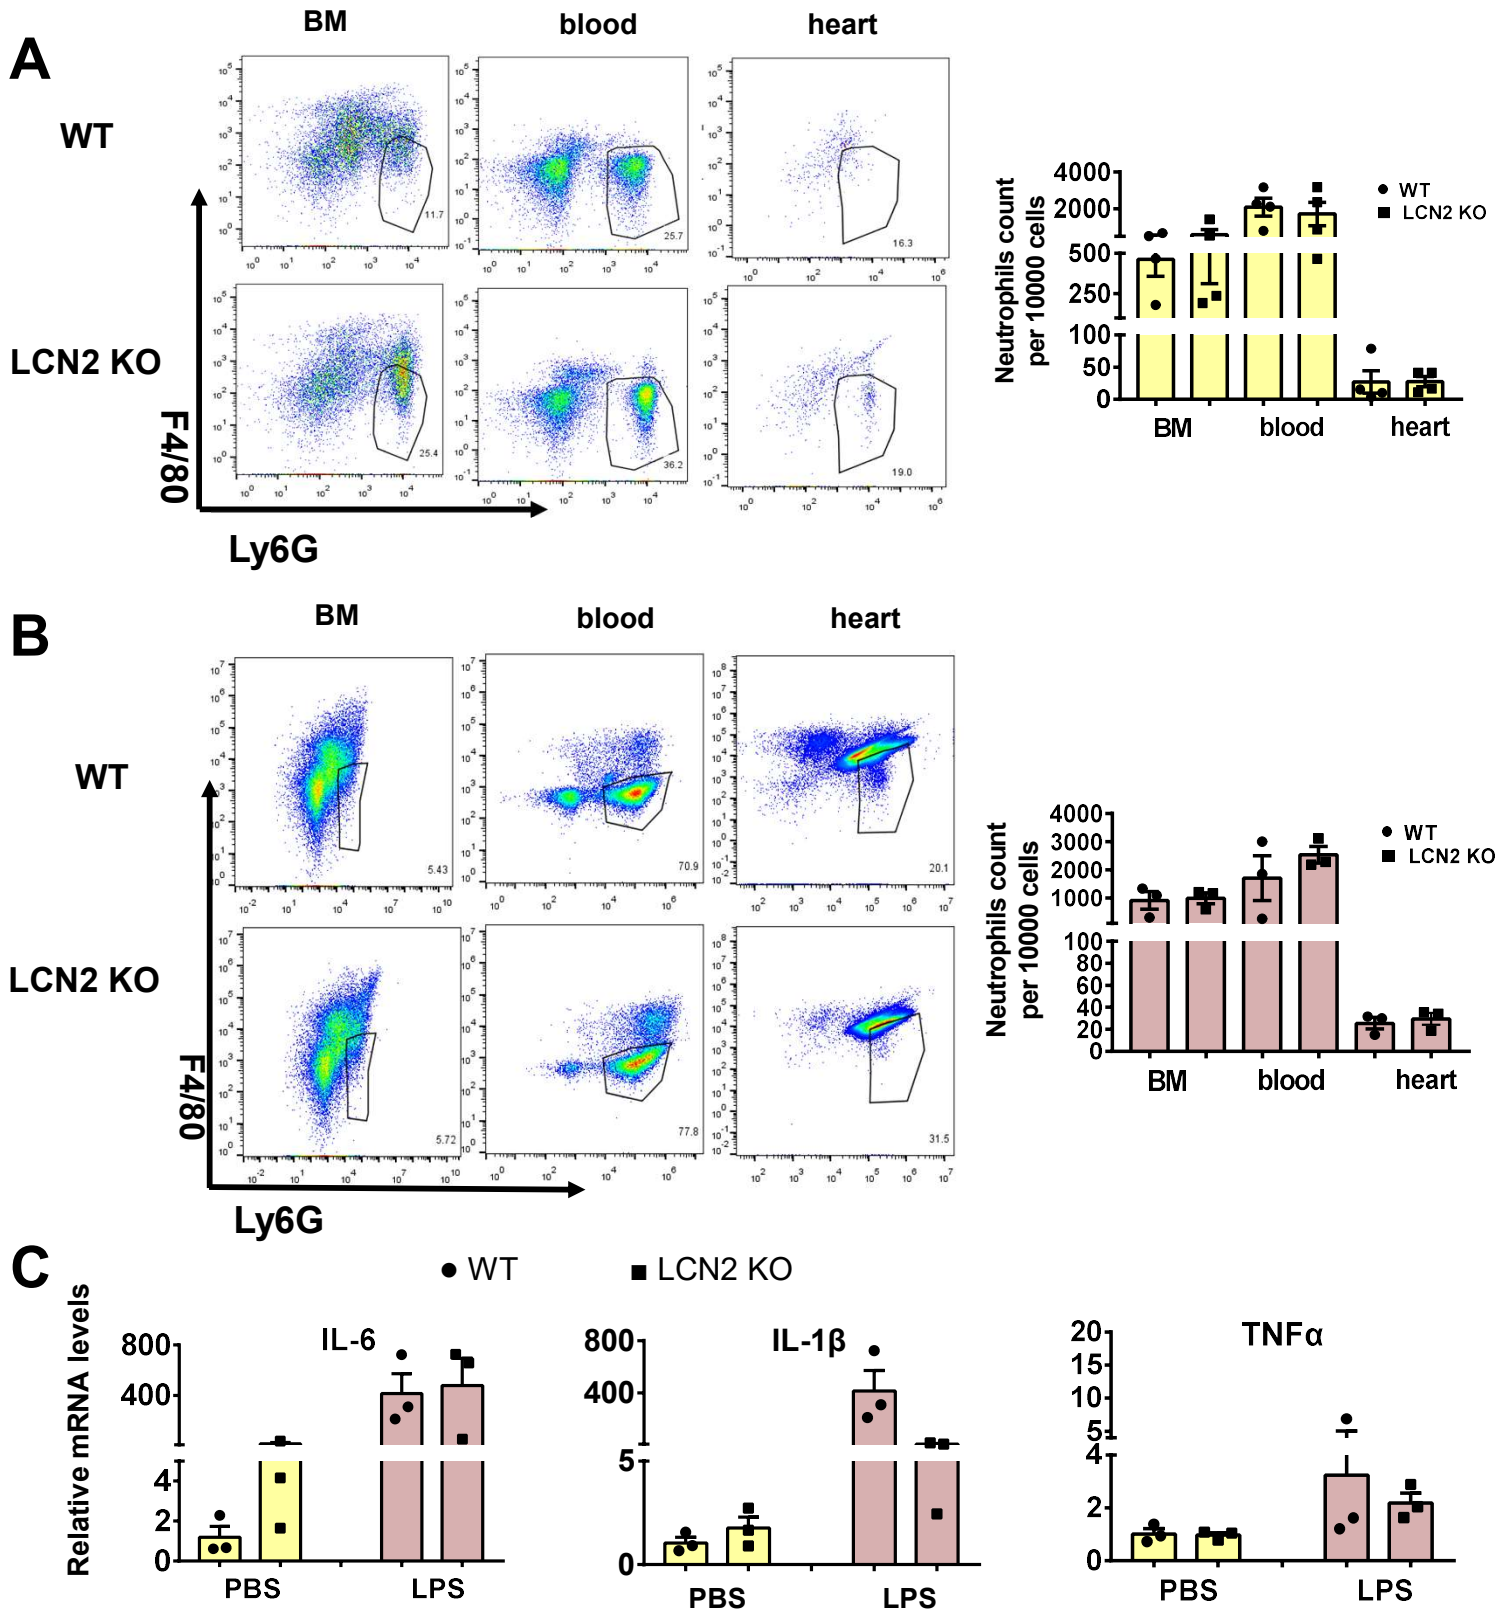

**Fig S7. Neutrophils infiltration , proinflammatory cytokine in LCN2 KO and WT mice. (A)** Flow cytometric analysis of the number of CD45+ F4/80-Ly6G+ cells among the bone marrow(BM),blood and isolated heart cells 12 h post intraperitoneal injection with PBS in LCN2 KO mice and their WT littermates (n=4 in each group). **(B)** Flow cytometric analysis of the number of CD45+F4/80- Ly6G+ cells among the bone marrow(BM),blood and isolated heart cells 12 h post intraperitoneal injection with LPS(25mg/kg) in LCN2 KO mice and their WT littermates (n=3 in each group). **(C)** Quantitative PCR analysis of mRNA levels of IL-6,IL-1 $\beta$ ,TNF  $\alpha$  in mice 12 h post intraperitoneal injection with either PBS or LPS(25mg/kg) in LCN2 KO mice and their WT littermates (n=3 in each group).Measurement data are presented as mean  $\pm$  SEM.
